# Supplementary figures and images for: Essential Oil of Citrus aurantium L. Leaves: Composition, Antioxidant Activity, Elastase and Collagenase Inhibition
Source: MDPI journal article supplement (doi:10.3390/agronomy12061466), 2022-06-18

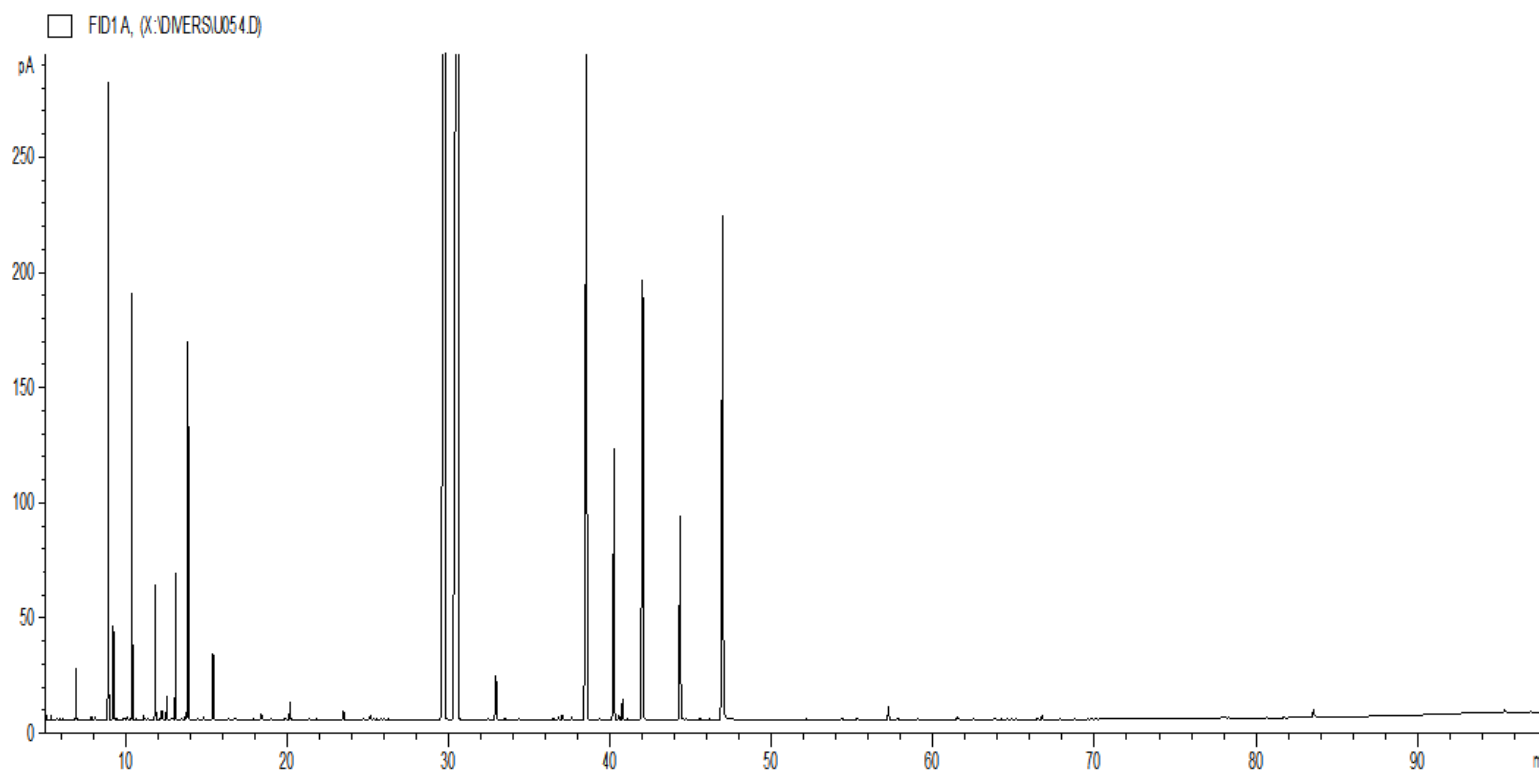

**Figure S1.** Supplementary material: Chromatogram of *C. aurantium* essential oil

Supplement: s1 [file s1]
